# Supplementary material for: La soja en Navarra: cultivo y experimentación
Source: MDPI journal article supplement (doi:10.3390/nu13062041), 2007-01-01
Supplement: s1 [file s1]

Supplementary information;

**Limited lactosylation of beta-lactoglobulin from cow's milk exerts strong influence on antigenicity and allergenicity**

Gerlof P. Bosman<sup>1</sup>; Sergio Oliveira<sup>2</sup>; Peter J. Simons<sup>3</sup>; Javier Sastre Torano<sup>1</sup>; Govert Somsen<sup>4</sup>; Leon Knippels<sup>2,5</sup>; Rob Haselberg<sup>4</sup>; Roland J. Pieters<sup>1</sup>; Johan Garssen<sup>2,5</sup>, Karen Knipping<sup>2,5\*</sup>.

Table S1 - Observed masses vs theoretical masses as shown in figure 2

| Protein    | Theoretical mass (Da) | Observed mass (Da) |
|------------|-----------------------|--------------------|
| BLGA*      | 18363.2               | 18364.8            |
| BLGB**     | 18277.1               | 18277.0            |
| BLGWT BLGA |                       | 18363.6            |
| BLGB       |                       | 18278.0            |

\*BLGA

LIVTQTMKGL DIQKVAGTWY SLAMAASDIS LLDAQSAPLR VYVEELKPTP  
EGDLEILLQK WENDECAQKK IIAEKTIPA VFKIDALNEN KVLVLDTDYK  
KYLLFCMENS AEPEQSLVCQ CLVRTPEVDD EALEKFDKAL KALPMHIRLS  
FNPTQLEEQC HI

Disulfide bridge formation; 66-160, 106-119

\*\*BLGB

LIVTQTMKGL DIQKVAGTWY SLAMAASDIS LLDAQSAPLR VYVEELKPTP  
EGDLEILLQK WENGECAQKK IIAEKTIPA VFKIDALNEN KVLVLDTDYK  
KYLLFCMENS AEPEQSLACQ CLVRTPEVDD EALEKFDKAL KALPMHIRLS  
FNPTQLEEQC HI

Disulfide bridge formation; 66-160, 106-119

Theoretical mass (Da) was calculated using PerkinElmer ChemDraw Professional 17.1 based on the sequences above which were deduced from Uniprot P02754.

Table S2 - Protocol for applying a triple coating on a bare fused silica capillary

| #  | Pressure (psi) | Duration (min) | Component | Event                             |
|----|----------------|----------------|-----------|-----------------------------------|
| 1  | 30             | 30             | NaOH      | Activation silanol groups         |
| 2  | 30             | 20             | MQ        | Rinse                             |
| 3  | 20             | 20             | BGE       | Rinse                             |
| 4  | 10             | 30             | PB        | Application 1 <sup>st</sup> layer |
| 5  | 30             | 10             | MQ        | Rinse                             |
| 6  | 10             | 30             | DS        | Application 2 <sup>nd</sup> layer |
| 7  | 30             | 10             | MQ        | Rinse                             |
| 8  | 10             | 30             | PB        | Application 3 <sup>rd</sup> layer |
| 9  | 30             | 45             | MQ        | Rinse                             |
| 10 | 20             | 45             | BGE       | Rinse                             |

MQ = MilliQ water, BGE = background electrolyte, PB = polybrene, DS = dextran sulphate

Proteins may adsorb to the negatively charged inner wall of BFS capillaries, complicating CE separation and reproducibility. Hence, to avoid adsorption, a 90-110 cm capillary was coated with a triple layer of PB, DS and PB. The separation of BLGA and BLGB was optimized using different BGE compositions (0.25, 0.5, 1 and 2 M acetic and formic acid) and by varying other parameters like capillary temperature, separation voltage and injection volume. A 90 cm triple layer coated capillary, maintained at 25°C, using a BGE of 1 M formic acid, 30 kV separation voltage and an injection volume of 0.86% of the total capillary volume were found to be optimal for the analysis of BLGA and BLGB.

Table S3 - Determination optimal resolution BLGWT separation

| BGE | M    | Resolution (90cm) | Resolution (110cm) | Commentary (90cm)  | Commentary (110cm)      |
|-----|------|-------------------|--------------------|--------------------|-------------------------|
| AA  | 0.25 | n.c.              | 0.39               | No separation      |                         |
|     | 0.5  | n.c.              | 0.84               | No separation      |                         |
|     | 1    | n.c.              | 0.82               | No separation      |                         |
|     | 2    | 0.59              | n.c.               |                    | Very low intensity      |
| FA  | 0.25 | 0.67              | 0.63               |                    |                         |
|     | 0.5  | 0.78              | n.c.               |                    | Retention time > 60 min |
|     | 1    | 0.88              | n.c.               |                    | Retention time > 60 min |
|     | 2    | n.c.              | n.c.               | Very low intensity | Retention time > 60 min |

*n.c.* = not calculated

Resolution was calculated using formula:  $2 (t_{r2}-t_{r1})/(W_2+W_1)$ , in which  $t_r$  = retention time,  $W$  = elution peak width of first eluting peak (1) or second eluting peak (2). Minimal capillary length of ~85 cm is necessary to able to connect the CE to the MS equipment. AA = acetic acid, FA = formic acid.

Table S4 - Observed masses of intact BLG and conjugates

| Theoretical masses intact protein |         |         | Observed masses intact protein |         |         |         |         |         |
|-----------------------------------|---------|---------|--------------------------------|---------|---------|---------|---------|---------|
| Lactose units                     | BLGA    | BLGB    | BLGWT                          |         | t=0     |         | t=3     |         |
|                                   |         |         | BLGA                           | BLGB    | BLGA    | BLGB    | BLGA    | BLGB    |
| 0                                 | 18367.3 | 18281.2 | 18363.4                        | 18276.2 | 18362.2 | 18275.4 |         |         |
| 1                                 | 18691.6 | 18605.5 |                                |         | 18687.4 | 18604.5 |         |         |
| 2                                 | 19015.9 | 18929.8 |                                |         | 19010.4 | 18925.5 |         |         |
| 3                                 | 19340.2 | 19254.1 |                                |         |         |         | 19335.6 | 19249.8 |
| 4                                 | 19664.5 | 19578.4 |                                |         |         |         | 19659.7 | 19573.7 |
| 5                                 | 19988.8 | 19902.7 |                                |         |         |         | 19983.8 | 19897.7 |
| 6                                 | 20313.1 | 20227.0 |                                |         |         |         | 20308.0 | 20222.9 |
| 7                                 | 20637.4 | 20551.3 |                                |         |         |         | 20632.0 | 20547.9 |
| 8                                 | 20961.7 | 20875.6 |                                |         |         |         | 20955.2 | 20872.3 |
| 9                                 | 21286.0 | 21199.9 |                                |         |         |         | 21279.6 | 21196.7 |
| 10                                | 21610.3 | 21524.2 |                                |         |         |         |         |         |
| 11                                | 21934.6 | 21848.5 |                                |         |         |         |         |         |
| 12                                | 22258.9 | 22172.8 |                                |         |         |         |         |         |
| 13                                | 22583.2 | 22497.1 |                                |         |         |         |         |         |
| 14                                | 22907.5 | 22821.4 |                                |         |         |         |         |         |
| 15                                | 23231.7 | 23145.6 |                                |         |         |         |         |         |
| 16                                | 23556.0 | 23469.9 |                                |         |         |         |         |         |
| 17                                | 23880.3 | 23794.2 |                                |         |         |         |         |         |
| 18                                | 24204.6 | 24118.5 |                                |         |         |         |         |         |
| 19                                | 24528.9 | 24442.8 |                                |         |         |         |         |         |
| Range lactose units / protein:    |         |         | 0                              |         | 0-2     |         | 3-9     |         |
| Lactose units                     | BLGA    | BLGB    | t=8                            |         | t=16    |         | t=24    |         |
|                                   |         |         | BLGA                           | BLGB    | BLGA    | BLGB    | BLGA    | BLGB    |
| 0                                 | 18367.3 | 18281.2 |                                |         |         |         |         |         |
| 1                                 | 18691.6 | 18605.5 |                                |         |         |         |         |         |
| 2                                 | 19015.9 | 18929.8 |                                |         |         |         |         |         |
| 3                                 | 19340.2 | 19254.1 |                                |         |         |         |         |         |
| 4                                 | 19664.5 | 19578.4 |                                |         |         |         |         |         |
| 5                                 | 19988.8 | 19902.7 |                                |         |         |         |         |         |
| 6                                 | 20313.1 | 20227.0 |                                |         |         |         |         |         |
| 7                                 | 20637.4 | 20551.3 |                                |         |         |         |         |         |
| 8                                 | 20961.7 | 20875.6 | 20958.7                        |         |         |         |         |         |
| 9                                 | 21286.0 | 21199.9 | 21282.0                        | 21194.3 |         |         |         |         |
| 10                                | 21610.3 | 21524.2 | 21605.3                        | 21517.6 |         |         |         |         |
| 11                                | 21934.6 | 21848.5 | 21930.3                        | 21842.5 |         |         |         |         |
| 12                                | 22258.9 | 22172.8 | 22254.4                        | 22167.7 | 22255.4 | 22168.7 |         |         |
| 13                                | 22583.2 | 22497.1 | 22578.6                        | 22492.4 | 22578.6 | 22494.2 | 22576.5 | 22490.3 |
| 14                                | 22907.5 | 22821.4 | 22902.7                        | 22817.3 | 22901.8 | 22817.4 | 22901.7 | 22817.9 |
| 15                                | 23231.7 | 23145.6 | 23228.3                        | 23142.6 | 23228.0 | 23140.4 | 23227.0 | 23140.4 |
| 16                                | 23556.0 | 23469.9 |                                |         | 23551.0 | 23464.3 | 23551.4 | 23463.5 |
| 17                                | 23880.3 | 23794.2 |                                |         |         |         |         |         |
| 18                                | 24204.6 | 24118.5 |                                |         |         |         |         |         |
| 19                                | 24528.9 | 24442.8 |                                |         |         |         |         |         |
| Range lactose units / protein:    |         |         | 8-15                           |         | 12-16   |         | 13-16   |         |

Table S5 - Percental increase glycated peptides during first 8 hours

Percental increase of identified glycated peptides at t = 3 relative to t = 0;

|          |          |          |          |          |          |          |          |          |          |          |          |          |          |          |          |          |          |          |          |          |          |          |          |          |          |          |          |          |          |      |
|----------|----------|----------|----------|----------|----------|----------|----------|----------|----------|----------|----------|----------|----------|----------|----------|----------|----------|----------|----------|----------|----------|----------|----------|----------|----------|----------|----------|----------|----------|------|
| 1<br>L   | 2<br>I   | 3<br>V   | 4<br>T   | 5<br>Q   | 6<br>T   | 7<br>M   | 8<br>K   | 9<br>G   | 10<br>L  | 11<br>D  | 12<br>I  | 13<br>Q  | 14<br>K  | 15<br>V  | 16<br>A  | 17<br>G  | 18<br>T  | 19<br>W  | 20<br>Y  | 21<br>S  | 22<br>L  | 23<br>A  | 24<br>M  | 25<br>A  | 26<br>A  | 27<br>S  | 28<br>D  | 29<br>I  | 30<br>S  |      |
| 22.5     | 22.5     | 22.5     | 22.5     | 22.5     | 22.5     | 22.5     | 22.5     |          |          |          |          |          |          |          |          |          |          |          |          |          |          |          |          |          |          |          |          |          |          |      |
| 31<br>L  | 32<br>L  | 33<br>D  | 34<br>A  | 35<br>Q  | 36<br>S  | 37<br>A  | 38<br>P  | 39<br>L  | 40<br>R  | 41<br>V  | 42<br>Y  | 43<br>V  | 44<br>E  | 45<br>E  | 46<br>L  | 47<br>K  | 48<br>P  | 49<br>T  | 50<br>P  | 51<br>E  | 52<br>G  | 53<br>D  | 54<br>L  | 55<br>E  | 56<br>I  | 57<br>L  | 58<br>L  | 59<br>Q  | 60<br>K  |      |
|          |          |          |          |          |          |          |          |          |          | 8.5      | 8.5      | 8.5      | 8.5      | 8.5      | 8.5      | 8.5      | 8.5      | 8.5      | 8.5      | 8.5      | 8.5      | 8.5      | 8.5      | 8.5      | 8.5      | 8.5      | 8.5      | 8.5      | 8.5      | 8.5  |
| 61<br>W  | 62<br>E  | 63<br>N  | 64<br>D  | 65<br>E  | 66<br>C  | 67<br>A  | 68<br>Q  | 69<br>K  | 70<br>K  | 71<br>I  | 72<br>I  | 73<br>A  | 74<br>E  | 75<br>K  | 76<br>T  | 77<br>K  | 78<br>I  | 79<br>P  | 80<br>A  | 81<br>V  | 82<br>F  | 83<br>K  | 84<br>I  | 85<br>D  | 86<br>A  | 87<br>L  | 88<br>N  | 89<br>E  | 90<br>N  |      |
|          |          |          |          |          |          |          |          |          |          | 14.4     | 14.4     | 14.4     | 14.4     | 14.4     | 35.9     | 35.9     |          |          |          |          |          |          |          | 17.0     | 17.0     | 17.0     | 17.0     | 17.0     | 17.0     | 17.0 |
| 91<br>K  | 92<br>V  | 93<br>L  | 94<br>V  | 95<br>L  | 96<br>D  | 97<br>T  | 98<br>D  | 99<br>Y  | 100<br>K | 101<br>K | 102<br>Y | 103<br>L | 104<br>L | 105<br>F | 106<br>C | 107<br>M | 108<br>E | 109<br>N | 110<br>S | 111<br>A | 112<br>E | 113<br>P | 114<br>E | 115<br>Q | 116<br>S | 117<br>L | 118<br>V | 119<br>C | 120<br>Q |      |
| 17.0     |          |          |          |          |          |          |          |          |          | 2.0      | 4.4      | 4.4      | 4.4      | 4.4      | 4.4      | 4.4      | 4.4      | 4.4      | 4.4      | 4.4      | 4.4      | 4.4      | 4.4      | 4.4      | 4.4      | 4.4      | 4.4      | 4.4      | 4.4      |      |
| 121<br>C | 122<br>L | 123<br>V | 124<br>R | 125<br>T | 126<br>P | 127<br>E | 128<br>V | 129<br>D | 130<br>D | 131<br>E | 132<br>A | 133<br>L | 134<br>E | 135<br>K | 136<br>F | 137<br>D | 138<br>K | 139<br>A | 140<br>L | 141<br>K | 142<br>A | 143<br>L | 144<br>P | 145<br>M | 146<br>H | 147<br>I | 148<br>R | 149<br>L | 150<br>S |      |
| 4.4      | 4.4      | 4.4      | 4.4      | 4.4      |          |          |          |          |          |          |          |          |          |          | 62.4     | 62.4     | 62.4     | 118.9    | 118.9    | 118.9    |          |          |          |          |          |          |          |          |          |      |
| 151<br>F | 152<br>N | 153<br>P | 154<br>T | 155<br>Q | 156<br>L | 157<br>E | 158<br>E | 159<br>Q | 160<br>C | 161<br>H | 162<br>I |          |          |          |          |          |          |          |          |          |          |          |          |          |          |          |          |          |          |      |

Percental increase of identified glycopeptides at t = 8 relative to t = 3;

|          |          |          |          |          |          |          |          |          |          |          |          |          |          |          |          |          |          |          |          |          |          |          |          |          |          |          |          |          |          |
|----------|----------|----------|----------|----------|----------|----------|----------|----------|----------|----------|----------|----------|----------|----------|----------|----------|----------|----------|----------|----------|----------|----------|----------|----------|----------|----------|----------|----------|----------|
| 1<br>L   | 2<br>I   | 3<br>V   | 4<br>T   | 5<br>Q   | 6<br>T   | 7<br>M   | 8<br>K   | 9<br>G   | 10<br>L  | 11<br>D  | 12<br>I  | 13<br>Q  | 14<br>K  | 15<br>V  | 16<br>A  | 17<br>G  | 18<br>T  | 19<br>W  | 20<br>Y  | 21<br>S  | 22<br>L  | 23<br>A  | 24<br>M  | 25<br>A  | 26<br>A  | 27<br>S  | 28<br>D  | 29<br>I  | 30<br>S  |
| 97.4     | 97.4     | 97.4     | 97.4     | 97.4     | 97.4     | 97.4     | 97.4     |          |          |          |          |          |          |          |          |          |          |          |          |          |          |          |          |          |          |          |          |          |          |
| 31<br>L  | 32<br>L  | 33<br>D  | 34<br>A  | 35<br>Q  | 36<br>S  | 37<br>A  | 38<br>P  | 39<br>L  | 40<br>R  | 41<br>V  | 42<br>Y  | 43<br>V  | 44<br>E  | 45<br>E  | 46<br>L  | 47<br>K  | 48<br>P  | 49<br>T  | 50<br>P  | 51<br>E  | 52<br>G  | 53<br>D  | 54<br>L  | 55<br>E  | 56<br>I  | 57<br>L  | 58<br>Q  | 59<br>Q  | 60<br>K  |
|          |          |          |          |          |          |          |          |          |          | 196.6    | 196.6    | 196.6    | 196.6    | 196.6    | 196.6    | 196.6    | 196.6    | 196.6    | 196.6    | 196.6    | 196.6    | 196.6    | 196.6    | 196.6    | 196.6    | 196.6    | 196.6    | 196.6    | 196.6    |
| 61<br>W  | 62<br>E  | 63<br>N  | 64<br>D  | 65<br>E  | 66<br>C  | 67<br>A  | 68<br>Q  | 69<br>K  | 70<br>K  | 71<br>I  | 72<br>I  | 73<br>A  | 74<br>E  | 75<br>K  | 76<br>T  | 77<br>K  | 78<br>I  | 79<br>P  | 80<br>A  | 81<br>V  | 82<br>F  | 83<br>K  | 84<br>I  | 85<br>D  | 86<br>A  | 87<br>L  | 88<br>N  | 89<br>E  | 90<br>N  |
| 38.9     | 38.9     | 38.9     | 38.9     | 38.9     | 38.9     | 38.9     | 38.9     | 38.9     |          |          |          |          |          |          |          |          |          |          |          |          |          |          |          |          |          |          |          |          |          |
| 91<br>K  | 92<br>V  | 93<br>L  | 94<br>V  | 95<br>L  | 96<br>D  | 97<br>T  | 98<br>Y  | 99<br>Y  | 100<br>K | 101<br>K | 102<br>Y | 103<br>L | 104<br>L | 105<br>F | 106<br>C | 107<br>M | 108<br>E | 109<br>N | 110<br>S | 111<br>A | 112<br>E | 113<br>P | 114<br>E | 115<br>Q | 116<br>S | 117<br>L | 118<br>V | 119<br>C | 120<br>Q |
|          | 8.9      | 8.9      | 8.9      | 8.9      | 8.9      | 8.9      | 8.9      | 8.9      | 8.9      | 50.1     | 29.9     | 29.9     | 29.9     | 29.9     | 29.9     | 29.9     | 29.9     | 29.9     | 29.9     | 29.9     | 29.9     | 29.9     | 29.9     | 29.9     | 29.9     | 29.9     | 29.9     | 29.9     | 29.9     |
| 121<br>C | 122<br>L | 123<br>V | 124<br>R | 125<br>T | 126<br>P | 127<br>E | 128<br>V | 129<br>D | 130<br>D | 131<br>E | 132<br>A | 133<br>L | 134<br>E | 135<br>K | 136<br>F | 137<br>D | 138<br>K | 139<br>A | 140<br>L | 141<br>K | 142<br>A | 143<br>L | 144<br>P | 145<br>M | 146<br>H | 147<br>I | 148<br>R | 149<br>L | 150<br>S |
| 29.9     | 29.9     | 29.9     | 29.9     |          |          |          |          |          |          |          |          |          |          |          |          |          |          |          |          |          | 27.4     | 27.4     | 27.4     | 27.4     | 27.4     | 27.4     | 27.4     | 27.4     |          |
| 151<br>F | 152<br>N | 153<br>P | 154<br>T | 155<br>Q | 156<br>L | 157<br>E | 158<br>E | 159<br>Q | 160<br>C | 161<br>H | 162<br>I |          |          |          |          |          |          |          |          |          |          |          |          |          |          |          |          |          |          |

Glycated residues are shown rimmed. Alternatively, the percental increase is represented by the green intensity.

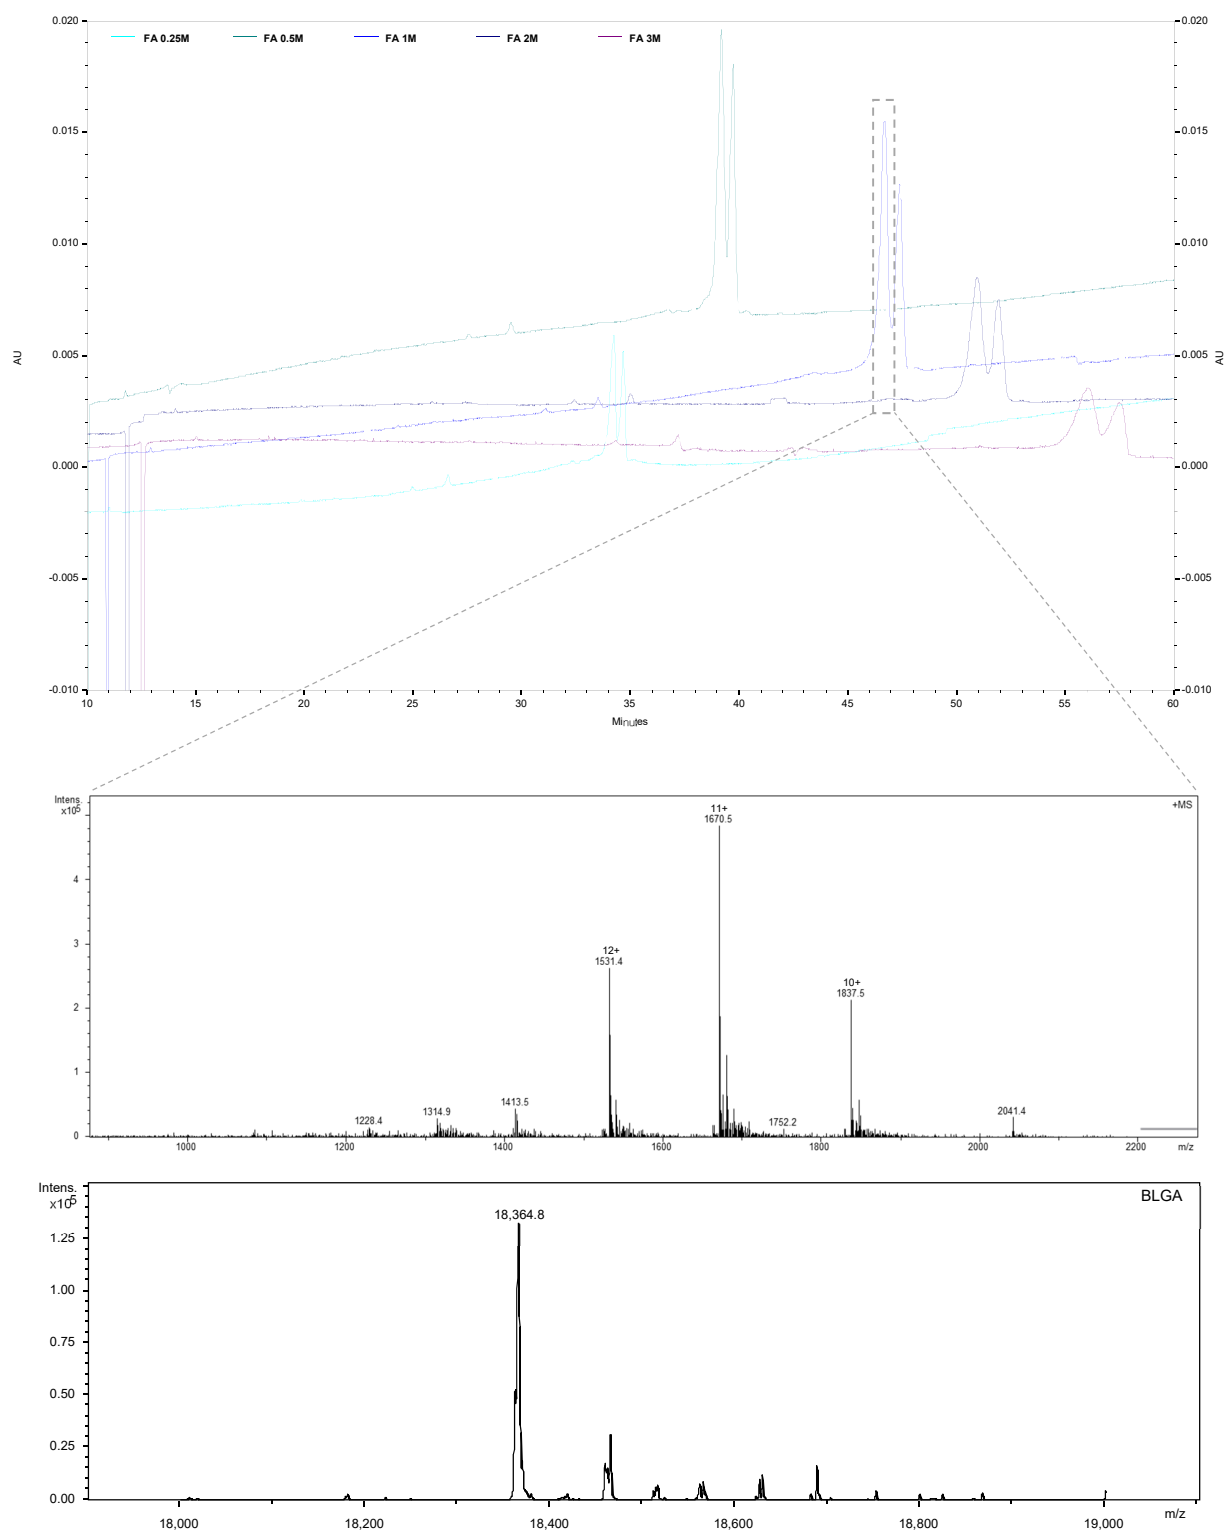

Figure S1 - CE-MS analysis of BLG. (Upper) Electropherogram. (Middle) Profile spectrum. (Bottom) Deconvoluted spectrum of BLGA. Using a triple layer coating and a capillary of 90 cm with a BGE of FA 1M best separation of BLGA and BLGB was observed (BLGA was the first peak to elute, secondly BLGB).
